# Supplementary material for: CC Chemokine Ligand 18 Correlates with Malignant Progression of Prostate Cancer
Source: Hindawi journal article supplement (doi:10.1155/2014/230183), 2014-01-01
Supplement: f1 [file 230183.f1.pdf]

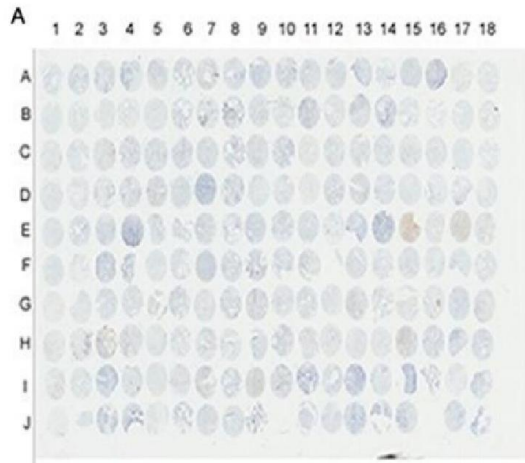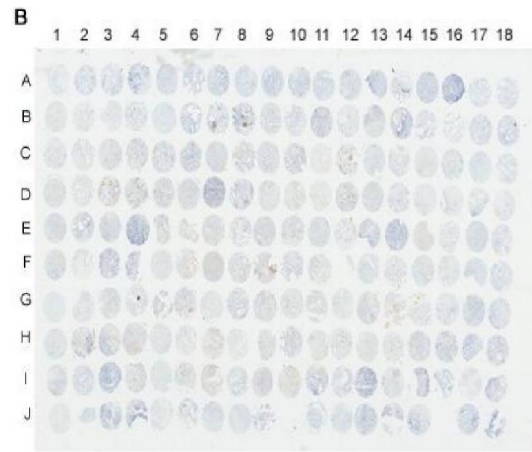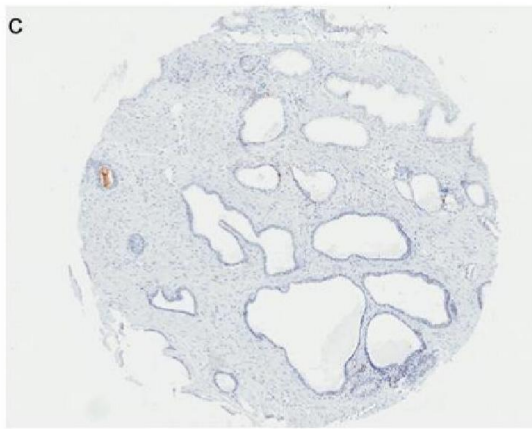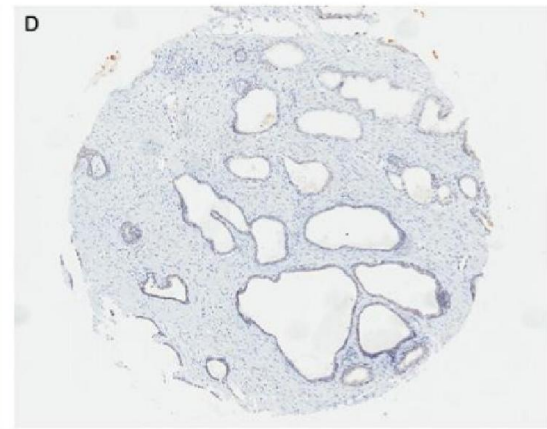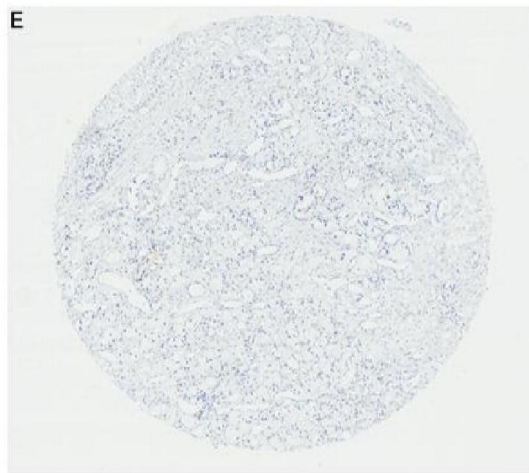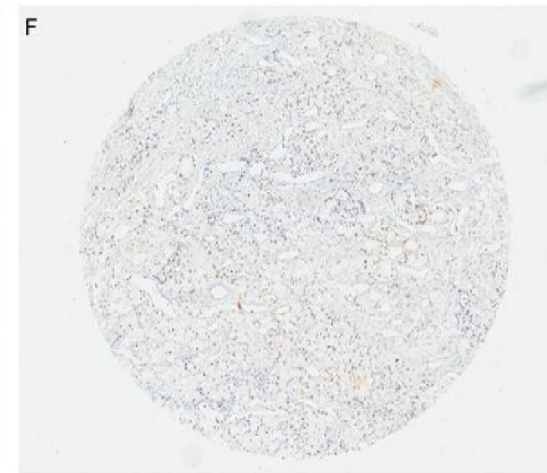

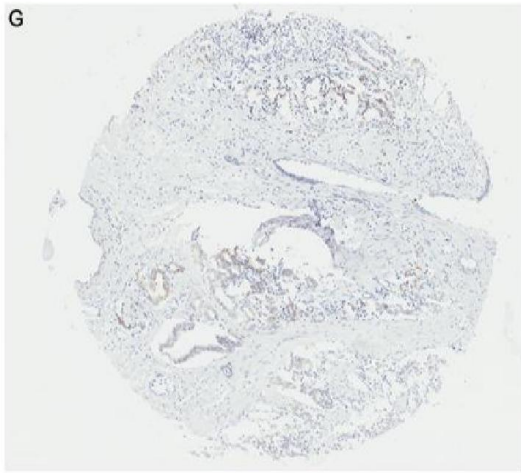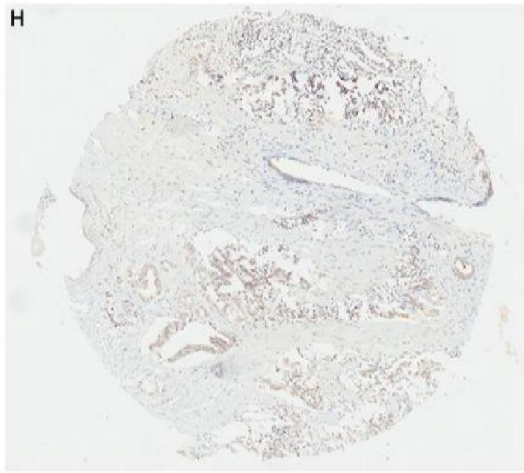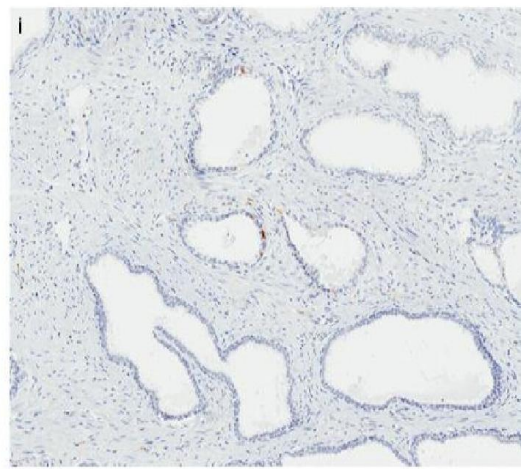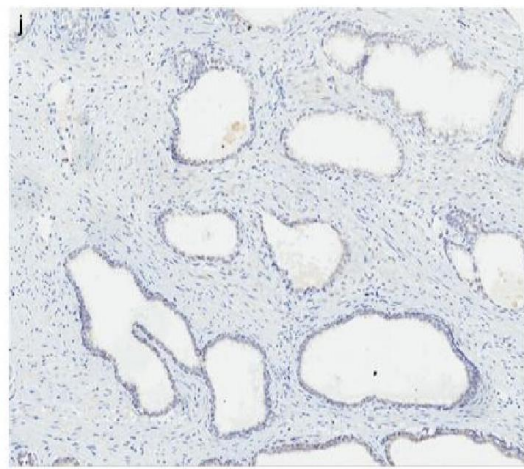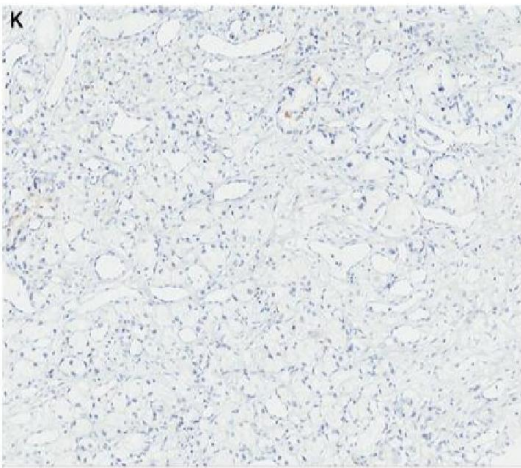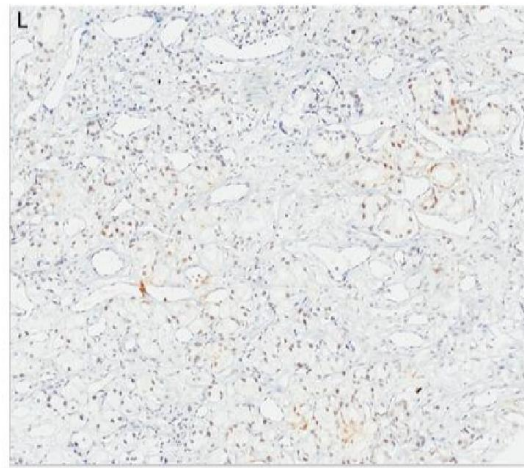

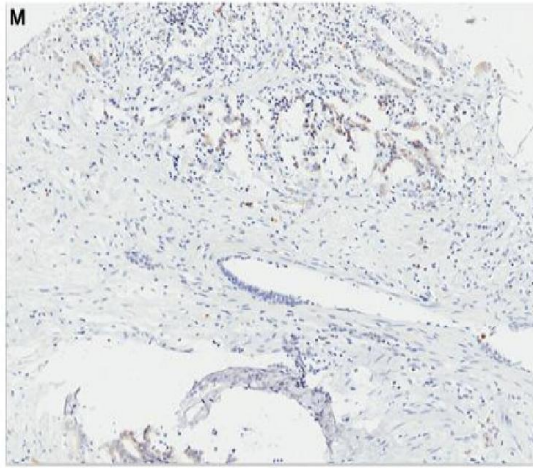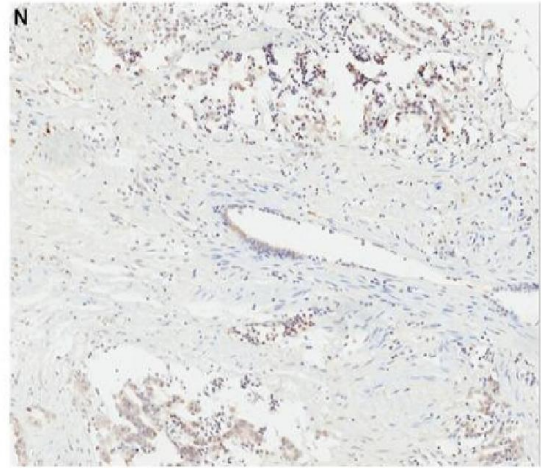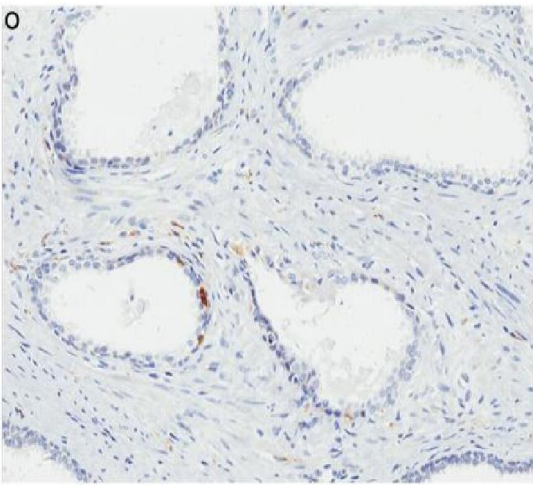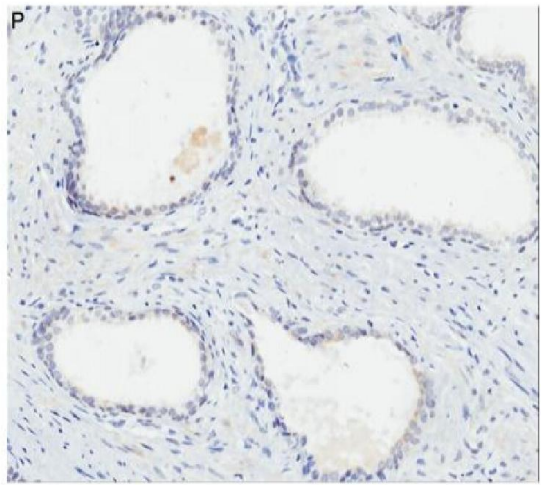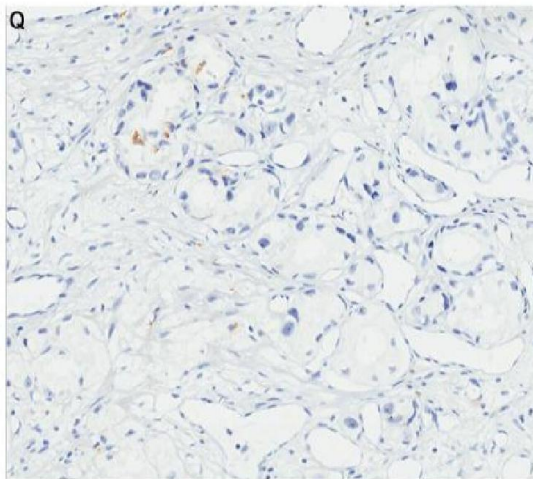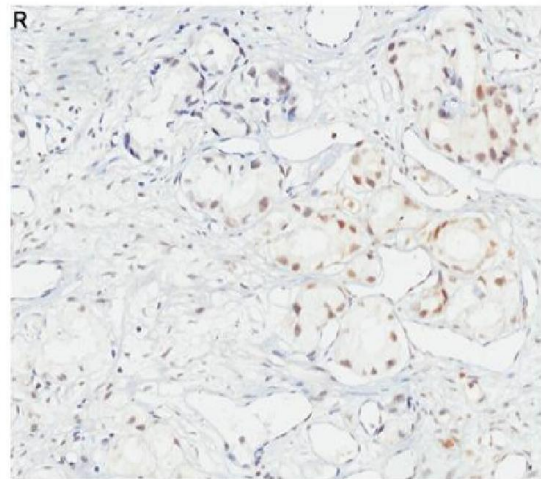

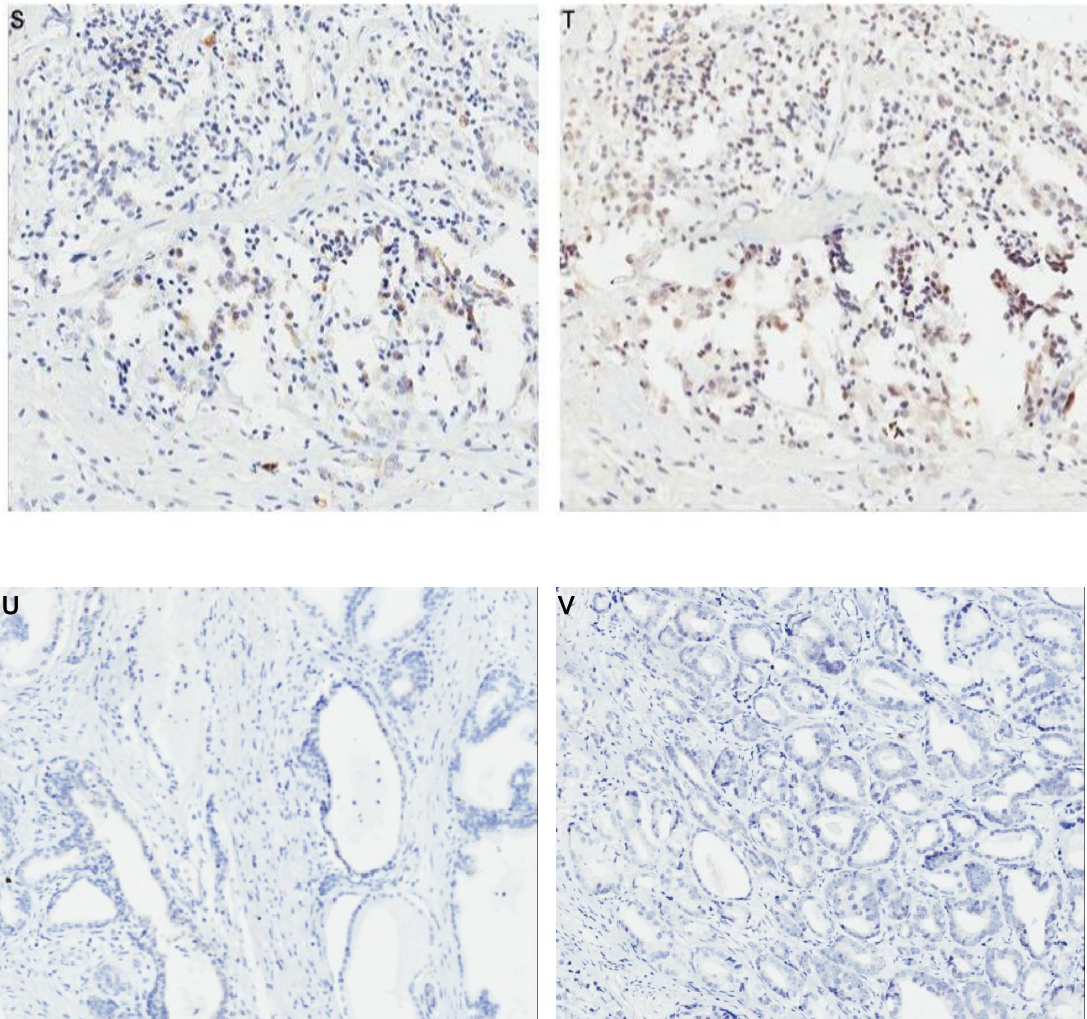

**Supplementary Fig S1.** Immunohistochemistry staining of our TMA Samples.

(A)CD68 immunostaining of TMA samples. (B)CCL18 immunostaining of TMA samples.

(C,E,G)CD68 Immunostaining of sample G8,F5,H7(Original magnification  $\times 50$ ),respectively.

(D,F,H)CCL18 Immunostaining of sample G8,F5,H7(Original magnification  $\times 50$ ),respectively.

(I,K,M)CD68 Immunostaining of sample G8,F5,H7(Original magnification  $\times 100$ ),respectively.

(J,L,N)CCL18 Immunostaining of sample G8,F5,H7(Original magnification  $\times 100$ ),respectively.

(O,Q,S)CD68 Immunostaining of sample G8,F5,H7(Original magnification $\times 200$ ),respectively. (P,R,T)

CCL18 Immunostaining of sample G8,F5,H7(Original magnification $\times 200$ ),respectively.

(U,V)Negative controls, stained with isotype-matched control IgG
